# Supplementary material
Source: PubMed Central journal article supplement (PMC2990963)
Supplement: NIHMS250782-supplement-Tables_S1-S3.pdf [file NIHMS250782-supplement-Tables_S1-S3.pdf]

## Supplementary Material

**Table S1.** Spearman's rank correlation coefficient between the *rhTPH2* genotype/haplotype and phenotypic data

| Haplotype or Locus | Cortisol                   |                            | ACTH    |         | CORTRES                    |                            | PERDEX                      |         | Self-biting rate           |                            |
|--------------------|----------------------------|----------------------------|---------|---------|----------------------------|----------------------------|-----------------------------|---------|----------------------------|----------------------------|
|                    | AM                         | PM                         | AM      | PM      | 15 min                     | 30 min                     | Night                       | Day     | 1999                       | 2000                       |
| M2                 | <b>-0.3901<sup>#</sup></b> | 0.1672                     | -0.1124 | 0.1573  | -0.0741                    | 0.0519                     | <b>0.5043<sup>*</sup></b>   | 0.3729  | 0.0119                     | 0.2234                     |
| M3                 | -0.1308                    | -0.0077                    | -0.0667 | -0.0501 | <b>0.5564<sup>**</sup></b> | 0.2120                     | 0.0935                      | 0.1870  | 0.0000                     | 0.0133                     |
| M4                 | 0.1994                     | 0.1246                     | -0.1072 | -0.1072 | -0.0910                    | -0.0820                    | <b>-0.5296<sup>*</sup></b>  | -0.3841 | -0.2921                    | -0.2104                    |
| M5                 | 0.3309                     | 0.0432                     | -0.0630 | -0.1732 | -0.0423                    | 0.0181                     | <b>-0.5705<sup>*</sup></b>  | -0.3483 | -0.0388                    | -0.0243                    |
| M5'                | -0.2415                    | -0.4087                    | 0.1602  | 0.1602  | -0.0637                    | -0.2641                    | 0.3027                      | 0.2596  | 0.0000                     | -0.1098                    |
| M9                 | 0.3539                     | <b>0.4665<sup>*</sup></b>  | -0.0696 | -0.0870 | -0.2851                    | -0.1322                    | 0.3116                      | 0.0104  | 0.1041                     | 0.0699                     |
| -1605T>C           | -0.3539                    | <b>-0.4665<sup>*</sup></b> | 0.0696  | 0.0870  | 0.2851                     | 0.1322                     | -0.3116                     | -0.0104 | -0.1041                    | -0.0699                    |
| -1491Tn            | -0.3539                    | <b>-0.4665<sup>*</sup></b> | 0.0696  | 0.0870  | 0.2502                     | -0.0036                    | -0.3116                     | -0.0104 | -0.1041                    | -0.1624                    |
| -1485(AT)n         | -0.0062                    | -0.3009                    | 0.0015  | 0.0573  | 0.2489                     | -0.0663                    | <b>-0.6047<sup>**</sup></b> | -0.2039 | -0.3287                    | -0.1491                    |
| (AT)6              | -0.0219                    | <b>0.5319<sup>*</sup></b>  | -0.0972 | -0.0486 | -0.2357                    | -0.0302                    | <b>0.5608<sup>*</sup></b>   | 0.1645  | 0.1842                     | <b>0.3764<sup>#</sup></b>  |
| (AT)7              | -0.1983                    | -0.2192                    | 0.0225  | 0.0450  | <b>0.5007<sup>*</sup></b>  | 0.0911                     | <b>-0.4105<sup>#</sup></b>  | -0.1457 | -0.2612                    | -0.1372                    |
| (AT)8              | 0.1489                     | -0.2830                    | 0.0667  | -0.0501 | -0.0855                    | -0.1588                    | <b>-0.4400<sup>#</sup></b>  | -0.2348 | -0.0401                    | -0.0982                    |
| -1454A>G           | 0.2415                     | <b>0.4087<sup>#</sup></b>  | -0.1602 | -0.1602 | 0.0637                     | 0.2641                     | -0.3027                     | -0.2596 | 0.0000                     | 0.1098                     |
| -1325In>Del        | -0.1014                    | 0.2946                     | -0.0972 | -0.0134 | 0.1616                     | 0.1951                     | <b>0.5548<sup>*</sup></b>   | 0.3364  | 0.0683                     | 0.1321                     |
| -363T>G            | -0.0562                    | 0.1366                     | -0.0904 | 0.0000  | 0.2887                     | 0.2037                     | -0.0948                     | -0.2933 | 0.1244                     | 0.2425                     |
| <b>2051A&gt;C</b>  | <b>0.6538<sup>**</sup></b> | 0.0385                     | -0.1501 | -0.3503 | <b>0.3824<sup>#</sup></b>  | <b>0.4729<sup>*</sup></b>  | -0.0877                     | -0.3839 | <b>-0.4068<sup>#</sup></b> | <b>-0.3842<sup>#</sup></b> |
| 2128S>L            | -0.2727                    | -0.2258                    | 0.0797  | 0.2347  | -0.1068                    | <b>-0.4552<sup>*</sup></b> | <b>-0.5012<sup>*</sup></b>  | -0.3009 | 0.2339                     | 0.1877                     |

\* $p < 0.05$ , \*\* $p < 0.01$ , # $0.05 \leq p < 0.10$ ; CORTRES: cortisol response to ACH challenge; PERDEX: DEX suppression of cortisol excretion (%). For each haplotype or allele, the carrier and non-carrier were designated as "1" and "2", respectively, while for each locus the genotype was designated as "1", "2" and "3" for the wild-type homozygote, wild-mutant heterozygote and mutant-mutant homozygote, respectively. The 2051A>C genotypes were designated as "1" for AA&AC and "2" for CC.

## Supplementary Material

**Table S2.** Distribution of the rhTPH2 5'-FR and 3'-UTR haplotypes in the cohort of 32 monkeys

| Group                            | n  | 5'-FR haplotype                                                                                                                                                                                                                                                                              |            |           |           |            |           |           |           |           |           |           | 3'-UTR haplotype     |            |                      |
|----------------------------------|----|----------------------------------------------------------------------------------------------------------------------------------------------------------------------------------------------------------------------------------------------------------------------------------------------|------------|-----------|-----------|------------|-----------|-----------|-----------|-----------|-----------|-----------|----------------------|------------|----------------------|
|                                  |    | M2                                                                                                                                                                                                                                                                                           | M3         | M4        | M4'       | M5         | M5'       | M7        | M9        | N1        | N2        | N3        | ACS                  | AAS        | GAL                  |
| Overall                          | 64 | 6<br>0.09                                                                                                                                                                                                                                                                                    | 20<br>0.31 | 4<br>0.06 | 2<br>0.03 | 14<br>0.22 | 6<br>0.09 | 1<br>0.02 | 8<br>0.13 | 1<br>0.02 | 1<br>0.02 | 1<br>0.02 | 30<br>0.47           | 18<br>0.28 | 16<br>0.25           |
| SW (1)                           | 40 | 1                                                                                                                                                                                                                                                                                            | 10         | 3         | 2         | 10         | 5         | 1         | 6         | 1         | 1         | -         | 18                   | 12         | 10                   |
| HFB (1a)                         | 20 | 1                                                                                                                                                                                                                                                                                            | 8          | 2         | -         | 4          | 2         | -         | 2         | 1         | -         | -         | 9                    | 5          | 6                    |
| LFB (1b)                         | 10 | -                                                                                                                                                                                                                                                                                            | 1          | 1         | 1         | 4          | 1         | -         | 2         | -         | -         | -         | 5                    | 4          | 1                    |
| NW (2)                           | 22 | <b>5*</b>                                                                                                                                                                                                                                                                                    | 10         | -         | -         | 3          | 1         | -         | 2         | -         | -         | 1         | 11                   | 5          | 6                    |
| HFB (2a)                         | 4  | 1                                                                                                                                                                                                                                                                                            | 1          | -         | -         | 1          | -         | -         | 1         | -         | -         | -         | -                    | 1          | 3                    |
| LFB (2b)                         | 14 | 3                                                                                                                                                                                                                                                                                            | 7          | -         | -         | 2          | -         | -         | 1         | -         | -         | 1         | <b>9<sup>#</sup></b> | 3          | 2                    |
| HFB (a)                          | 24 | 2                                                                                                                                                                                                                                                                                            | 9          | 2         | -         | 5          | 2         | -         | 3         | 1         | -         | -         | 9                    | 6          | <b>9<sup>#</sup></b> |
| LFB (b)                          | 24 | 3                                                                                                                                                                                                                                                                                            | 8          | 1         | 1         | 6          | 1         | -         | 3         | -         | -         | 1         | 14                   | 7          | 3                    |
| <i>Chi</i> -Square test<br>(R×C) |    | <b>5'</b> : 1, 2: $p=0.0326$ ; a, b: $p=1.0000$ ; 1a, 1b: $p=0.1804$ ; 2a, 2b: $p=0.7397$ ; 1a, 2a: $p=0.8749$ ; <b>1b, 2b: <math>p=0.0375</math></b><br><b>3'</b> : 1, 2: $p=0.6248$ ; a, b: $p=0.1658$ ; 1a, 1b: $p=0.2218$ ; 2a, 2b: $p=0.1647$ ; 1a, 2a: $p=0.3029$ ; 1b, 2b: $p=0.3862$ |            |           |           |            |           |           |           |           |           |           |                      |            |                      |

SW: self-wounder; NW: non-wounder; HFB: high-frequency biter; LFB: low-frequency biter. \* $p<0.05$  for SW vs NW, <sup>#</sup> $p<0.05$  for HFB vs LFB assessed for the individual haplotype (2×2 table). The incidence of each haplotype was given for the overall group. *P* values were given for the comparisons of haplotype distribution between SIB groups (R×C table). The Fisher's exact test and Mantel-Haenszel *Chi*-Square test were used for 2×2 and R×C tables, respectively.

**Table S3.** The effect of the rhTPH2 5' (-1485(AT)<sub>n</sub>) and 3' (2015A>C) genotype and their interaction on the physiology and self-biting behavior in mother- and peer-reared monkeys

| Variable  | Genotype | Mother-Reared              |                             |             |              | Peer-Reared                |                            |             |              |
|-----------|----------|----------------------------|-----------------------------|-------------|--------------|----------------------------|----------------------------|-------------|--------------|
|           |          | Mean1 <sub>(n)</sub>       | Mean2 <sub>(n)</sub>        | <i>F</i>    | <i>p</i>     | Mean1 <sub>(n)</sub>       | Mean2 <sub>(n)</sub>       | <i>F</i>    | <i>p</i>     |
| HIAA      | 5'       | <b>33.7</b> <sub>(5)</sub> | <b>49.5</b> <sub>(5)</sub>  | <b>4.82</b> | <b>0.070</b> | 43.4 <sub>(2)</sub>        | 45.6 <sub>(6)</sub>        | 0.03        | 0.867        |
|           | 3'       | <b>49.9</b> <sub>(3)</sub> | <b>33.3</b> <sub>(7)</sub>  | <b>5.31</b> | <b>0.061</b> | 46.0 <sub>(4)</sub>        | 42.4 <sub>(4)</sub>        | 0.11        | 0.755        |
|           | 5'x3'    | -                          | -                           | <b>4.25</b> | <b>0.085</b> | -                          | -                          | <b>5.35</b> | <b>0.082</b> |
| CORT-AM   | 5'       | 29.8 <sub>(6)</sub>        | 24.1 <sub>(5)</sub>         | 0.19        | 0.677        | 32.4 <sub>(2)</sub>        | 33.3 <sub>(6)</sub>        | 0.01        | 0.918        |
|           | 3'       | <b>32.7</b> <sub>(3)</sub> | <b>21.2</b> <sub>(8)</sub>  | <b>4.61</b> | <b>0.069</b> | <b>42.7</b> <sub>(4)</sub> | <b>23.4</b> <sub>(4)</sub> | <b>4.67</b> | <b>0.097</b> |
|           | 5'x3'    | -                          | -                           | 0.94        | 0.364        | -                          | -                          | 0.02        | 0.895        |
| CORT-PM   | 5'       | <b>12.7</b> <sub>(6)</sub> | <b>21.3</b> <sub>(5)</sub>  | <b>7.79</b> | <b>0.027</b> | 14.2 <sub>(2)</sub>        | 18.5 <sub>(6)</sub>        | 0.89        | 0.400        |
|           | 3'       | 20.2 <sub>(3)</sub>        | 13.7 <sub>(8)</sub>         | 2.86        | 0.134        | 14.6 <sub>(4)</sub>        | 18.0 <sub>(4)</sub>        | 0.54        | 0.502        |
|           | 5'x3'    | -                          | -                           | 2.10        | 0.191        | -                          | -                          | 1.28        | 0.321        |
| ACTH-AM   | 5'       | 71.2 <sub>(5)</sub>        | 66.7 <sub>(5)</sub>         | 0.07        | 0.805        | 68.8 <sub>(2)</sub>        | 60.6 <sub>(6)</sub>        | 0.38        | 0.571        |
|           | 3'       | 69.6 <sub>(3)</sub>        | 68.3 <sub>(7)</sub>         | 0.0         | 0.948        | 55.6 <sub>(4)</sub>        | 73.9 <sub>(4)</sub>        | 1.88        | 0.243        |
|           | 5'x3'    | -                          | -                           | 2.01        | 0.206        | -                          | -                          | 0.40        | 0.563        |
| ACTH-PM   | 5'       | 65.9 <sub>(5)</sub>        | 63.8 <sub>(5)</sub>         | 0.15        | 0.711        | 64.2 <sub>(2)</sub>        | 49.6 <sub>(6)</sub>        | 1.40        | 0.303        |
|           | 3'       | 63.8 <sub>(3)</sub>        | 65.9 <sub>(7)</sub>         | 0.04        | 0.842        | <b>43.6</b> <sub>(4)</sub> | <b>70.2</b> <sub>(4)</sub> | <b>4.64</b> | <b>0.098</b> |
|           | 5'x3'    | -                          | -                           | <b>3.74</b> | <b>0.101</b> | -                          | -                          | 0.37        | 0.578        |
| CORTRES15 | 5'       | 17.4 <sub>(7)</sub>        | 17.9 <sub>(6)</sub>         | 0           | 0.964        | 17.0 <sub>(3)</sub>        | 14.0 <sub>(5)</sub>        | 1.67        | 0.265        |
|           | 3'       | <b>20.3</b> <sub>(3)</sub> | <b>15.3</b> <sub>(10)</sub> | <b>3.32</b> | <b>0.102</b> | <b>17.9</b> <sub>(3)</sub> | <b>13.2</b> <sub>(5)</sub> | <b>4.06</b> | <b>0.114</b> |
|           | 5'x3'    | -                          | -                           | 0.28        | 0.607        | -                          | -                          | 1.66        | 0.268        |
| CORTRES30 | 5'       | 14.1 <sub>(7)</sub>        | 12.5 <sub>(6)</sub>         | 0.32        | 0.583        | 12.4 <sub>(3)</sub>        | 11.9 <sub>(5)</sub>        | 0.04        | 0.852        |
|           | 3'       | 15.3 <sub>(3)</sub>        | 11.3 <sub>(10)</sub>        | 2.24        | 0.169        | 14.2 <sub>(3)</sub>        | 10.2 <sub>(5)</sub>        | 2.16        | 0.215        |
|           | 5'x3'    | -                          | -                           | 0.31        | 0.593        | -                          | -                          | 0.52        | 0.510        |
| DEX-N     | 5'       | <b>56.4</b> <sub>(7)</sub> | <b>93.8</b> <sub>(4)</sub>  | <b>25.2</b> | <b>0.001</b> | 30.0 <sub>(2)</sub>        | 64.5 <sub>(4)</sub>        | 1.60        | 0.333        |
|           | 3'       | <b>46.0</b> <sub>(2)</sub> | <b>75.3</b> <sub>(9)</sub>  | <b>3.14</b> | <b>0.114</b> | 46.8 <sub>(3)</sub>        | 47.8 <sub>(3)</sub>        | 0           | 0.974        |
|           | 5'x3'    | -                          | -                           | -           | -            | -                          | -                          | 2.71        | 0.241        |
| DEX-D     | 5'       | 62.9 <sub>(7)</sub>        | 80.3 <sub>(4)</sub>         | 0.16        | 0.703        | 24.0 <sub>(2)</sub>        | 41.0 <sub>(4)</sub>        | 0.91        | 0.442        |
|           | 3'       | <b>35.2</b> <sub>(2)</sub> | <b>76.8</b> <sub>(9)</sub>  | <b>3.92</b> | <b>0.083</b> | 23.5 <sub>(3)</sub>        | 41.5 <sub>(3)</sub>        | 1.02        | 0.420        |
|           | 5'x3'    | -                          | -                           | -           | -            | -                          | -                          | 1.81        | 0.311        |
| SB-1999   | 5'       | 0.050 <sub>(6)</sub>       | 0.094 <sub>(5)</sub>        | 0.22        | 0.652        | 0.060 <sub>(2)</sub>       | 0.088 <sub>(4)</sub>       | 0.22        | 0.683        |
|           | 3'       | 0.020 <sub>(2)</sub>       | 0.081 <sub>(9)</sub>        | 0.72        | 0.422        | 0.023 <sub>(3)</sub>       | 0.125 <sub>(3)</sub>       | 3.10        | 0.221        |
|           | 5'x3'    | -                          | -                           | -           | -            | -                          | -                          | 0.09        | 0.792        |
| SB-2000   | 5'       | 0.068 <sub>(7)</sub>       | 0.105 <sub>(6)</sub>        | 0.11        | 0.746        | 0.018 <sub>(3)</sub>       | 0.125 <sub>(5)</sub>       | 1.53        | 0.284        |
|           | 3'       | 0.025 <sub>(3)</sub>       | 0.148 <sub>(10)</sub>       | 1.23        | 0.296        | 0.030 <sub>(3)</sub>       | 0.113 <sub>(5)</sub>       | 0.89        | 0.398        |
|           | 5'x3'    | -                          | -                           | 0.06        | 0.813        | -                          | -                          | 0.29        | 0.618        |

\*Statistics were performed by ANOVA2. Mean1 represents the Tukey-Kramer least-squares mean for -1845(AT)<sub>6</sub> carrier (5') or 2051CC (3') genotype, while Mean2 represents the Tukey-Kramer least-squares mean for -1845(AT)<sub>6</sub> non-carrier (5') or 2051AA&AC (3'). The sample size (n) for each group was shown in parenthesis.
